# Supplementary material for: In situ coupled nickel-based layered double hydroxides with MXene to enhance supercapacitor performance
Source: Royal Society of Chemistry journal article supplement (doi:10.1039/d3tc01791e), 2023-01-01
Supplement: d3tc01791e1.pdf [file d3tc01791e1.pdf]

## Supporting Information

### **In-situ Coupled Nickel-based Layered Double Hydroxides with MXene to Enhance the Supercapacitor Performance**

Guorong Wang<sup>\*+</sup>, Guiquan Liu<sup>+</sup>, Zhiliang Jin<sup>\*</sup>

*School of Chemistry and Chemical Engineering, Ningxia Key Laboratory of Solar Chemical  
Conversion Technology, Key Laboratory for Chemical Engineering and Technology, State Ethnic  
Affairs Commission, North Minzu University, Yinchuan 750021, P.R.China*

Corresponding author: [guorongwang@nwnu.edu.cn](mailto:guorongwang@nwnu.edu.cn) (G. R. Wang); [zl-jin@nwnu.edu.cn](mailto:zl-jin@nwnu.edu.cn) (Z. L. Jin)

<sup>+</sup> equal contribution

## Results and Discussion

### 1. Composition, Structures and Morphologies Characterization

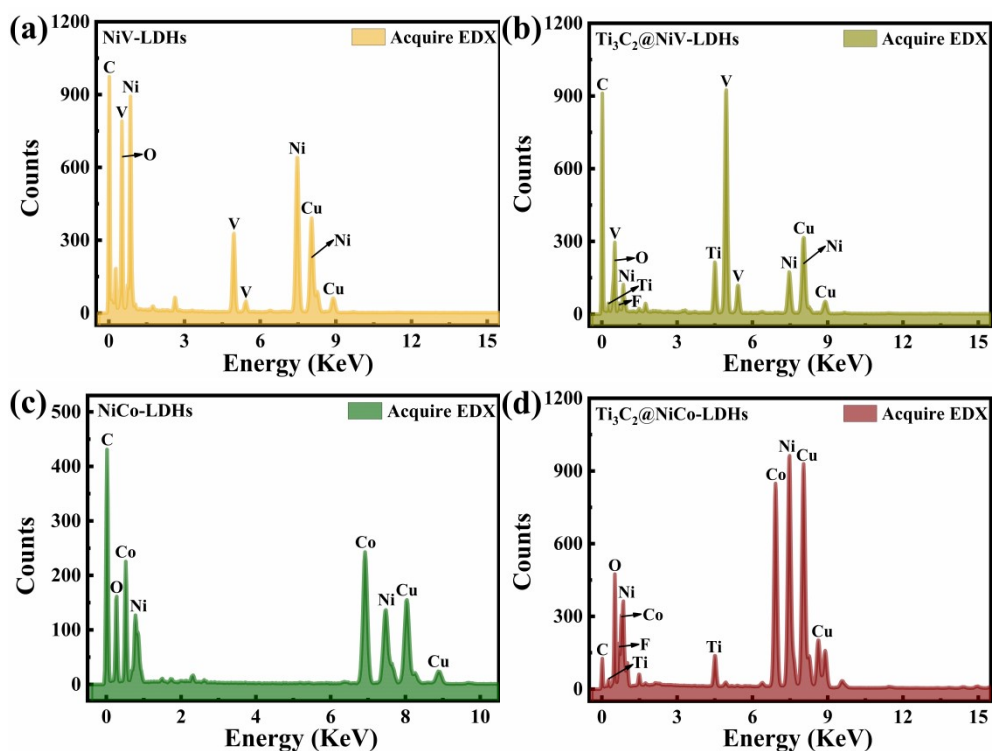

**Fig. S1.** The EDX spectrum of (a) NiV-LDHs, (b)  $\text{Ti}_3\text{C}_2@\text{NiV-LDHs}$ , (c) NiCo-LDHs and (d)  $\text{Ti}_3\text{C}_2@\text{NiCo-LDHs}$ .

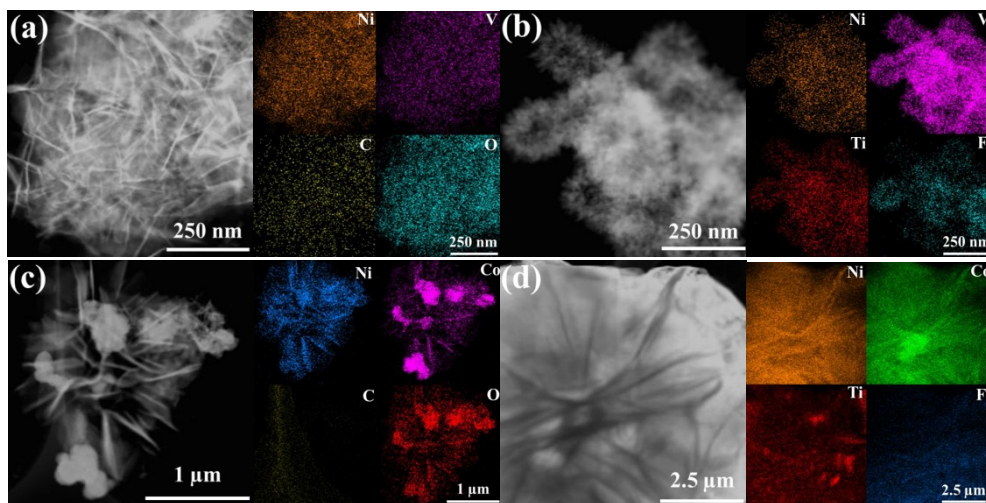

**Fig. S2.** Elements mapping of (a) NiV-LDHs, (b)  $\text{Ti}_3\text{C}_2@\text{NiV-LDHs}$ , (c) NiCo-LDHs and (d)  $\text{Ti}_3\text{C}_2@\text{NiCo-LDHs}$ .

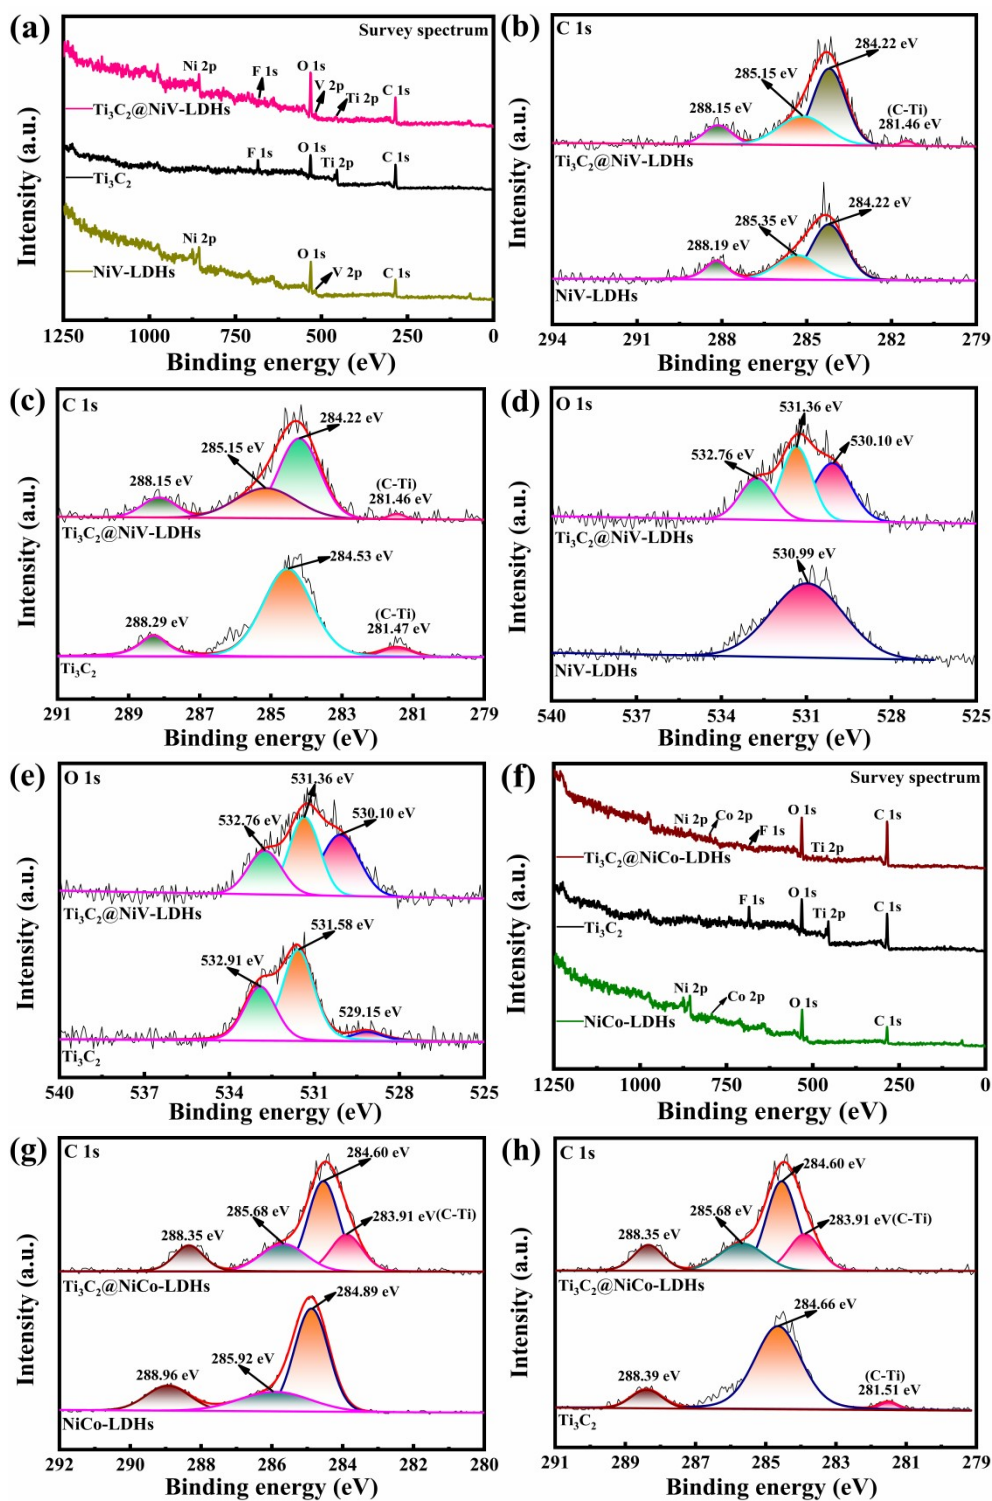

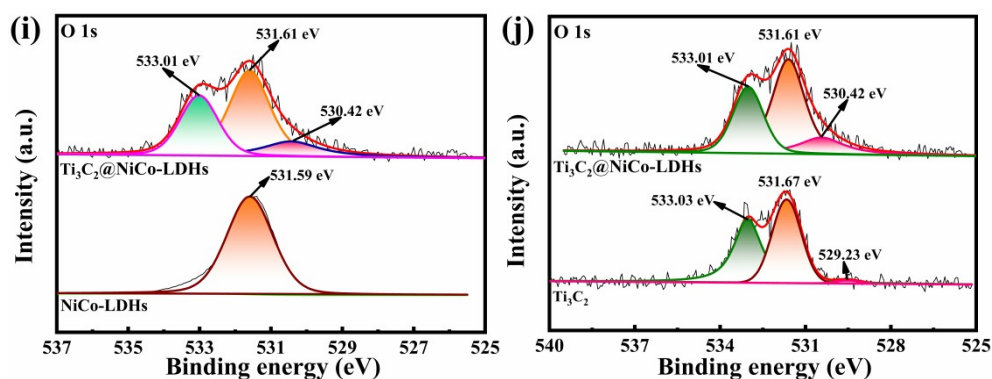

**Fig. S3.** The XPS spectra of the NiV-LDHs,  $\text{Ti}_3\text{C}_2$  and the  $\text{Ti}_3\text{C}_2@\text{NiV-LDHs}$ : (a) Survey spectrum, (b) C 1s, (c) C 1s, (d) O 1s, (e) O 1s, respectively. (f) Survey spectrum of NiCo-LDHs,  $\text{Ti}_3\text{C}_2$  and  $\text{Ti}_3\text{C}_2@\text{NiCo-LDHs}$ . (g) C 1s XPS spectrum of NiCo-LDHs and  $\text{Ti}_3\text{C}_2@\text{NiCo-LDHs}$ . (h) C 1s XPS spectrum of  $\text{Ti}_3\text{C}_2$  and  $\text{Ti}_3\text{C}_2@\text{NiCo-LDHs}$ . (i) O 1s XPS spectrum of NiCo-LDHs and  $\text{Ti}_3\text{C}_2@\text{NiCo-LDHs}$ . (j) O 1s XPS spectrum of  $\text{Ti}_3\text{C}_2$  and  $\text{Ti}_3\text{C}_2@\text{NiCo-LDHs}$ .

## 2. Three-Electrode System

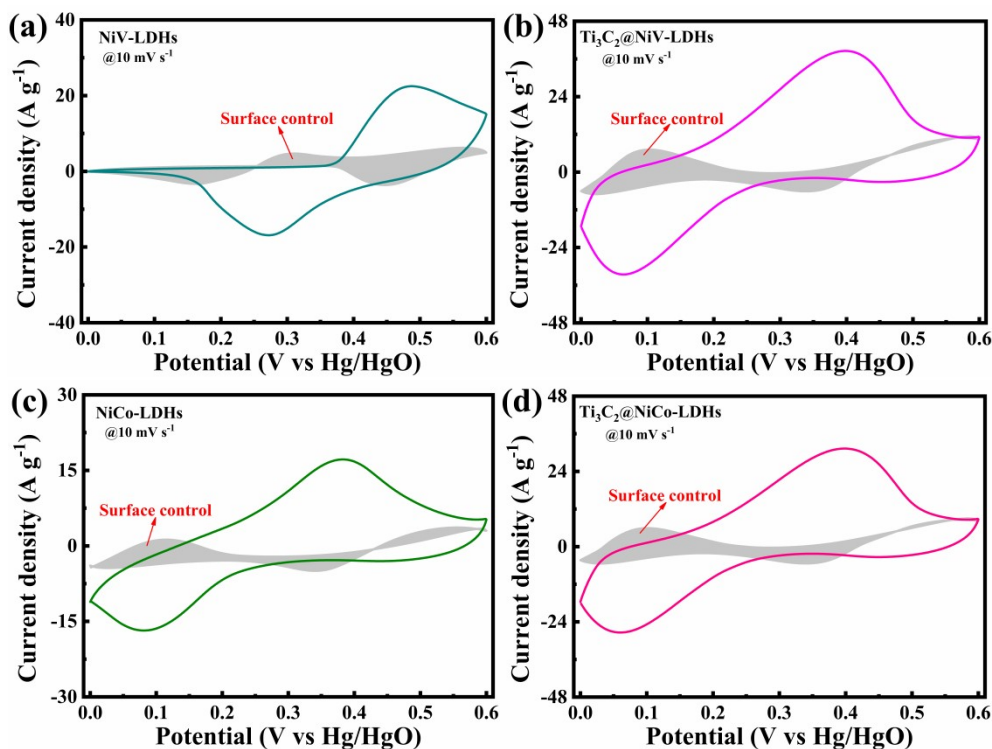

**Fig. S4.** (a) The shaded area represents the capacitance contribution of NiV-LDHs at  $10 \text{ mV s}^{-1}$ . (b) The shaded area indicates the capacitive contribution of  $\text{Ti}_3\text{C}_2@\text{NiV-LDHs}$  at  $10 \text{ mV s}^{-1}$ . (c) The gray area represents the portion of the NiCo-LDHs surface control contribution. (d) The gray area represents the portion of the  $\text{Ti}_3\text{C}_2@\text{NiCo-LDHs}$  surface control contribution.

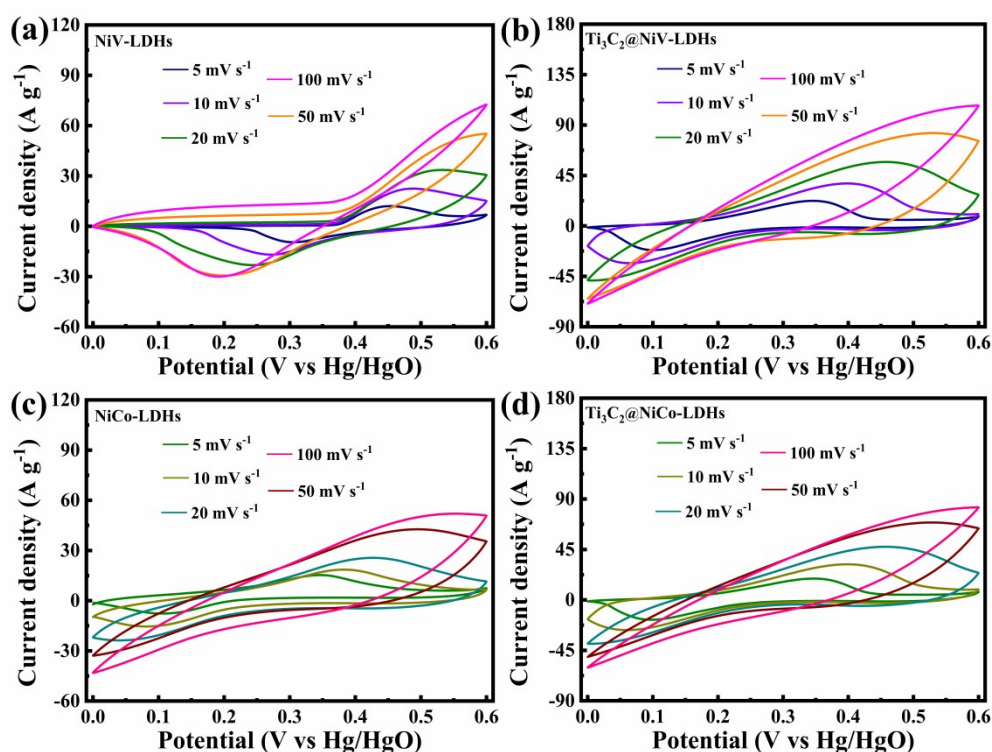

**Fig. S5.** (a) The cyclic voltammetry characteristic curve of NiV-LDHs at 5 to 100  $\text{mV s}^{-1}$ . (b) The CV curve of  $\text{Ti}_3\text{C}_2@\text{NiV-LDHs}$  at 5 to 100  $\text{mV s}^{-1}$ . (c) Cyclic characteristics curve of the NiCo-LDHs tested. (d) Cyclic characteristics curve of the  $\text{Ti}_3\text{C}_2@\text{NiCo-LDHs}$  tested.

### 3. Two-Electrode System

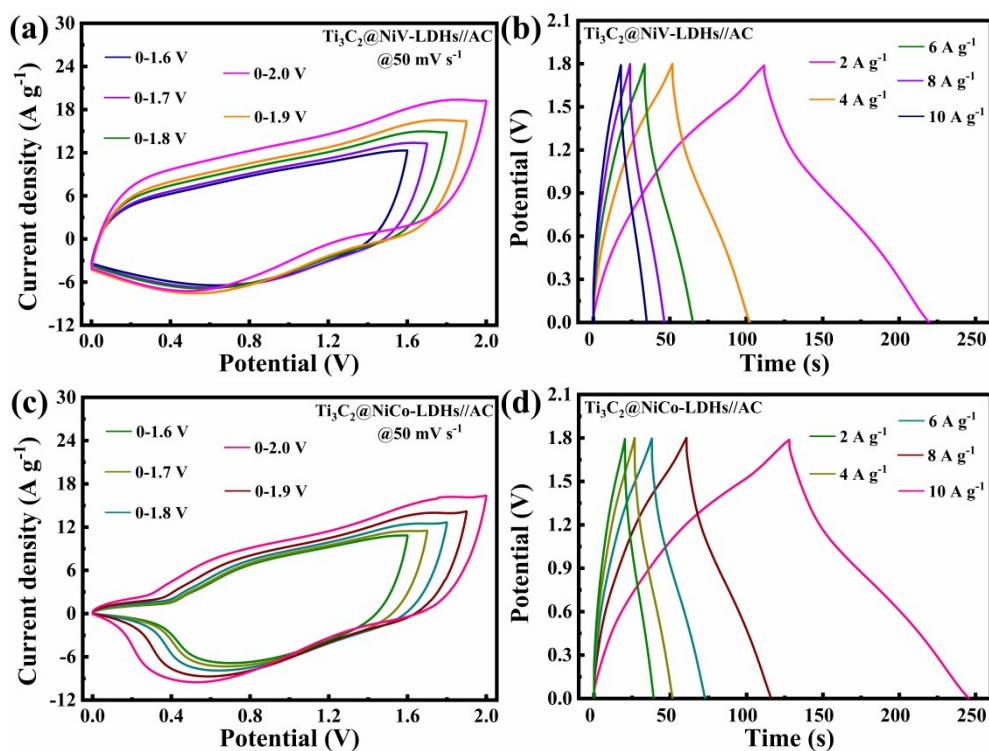

**Fig. S6.** (a) Cyclic voltammetry characteristic curves of  $\text{Ti}_3\text{C}_2@\text{NiV-LDHs}//\text{AC}$  ASC at 50  $\text{mV s}^{-1}$  of different voltage windows. (b) Constant current charge-discharge curves of  $\text{Ti}_3\text{C}_2@\text{NiV-LDHs}//\text{AC}$  ASC at 2  $\text{A g}^{-1}$  to 10  $\text{A g}^{-1}$ .

$\text{g}^{-1}$ . (c) Cyclic voltammetry curves of self-assembled  $\text{Ti}_3\text{C}_2@\text{NiCo-LDHs}/\text{AC}$  soft package devices under different voltage windows. (d) Constant current charge-discharge curve of the  $\text{Ti}_3\text{C}_2@\text{NiCo-LDHs}/\text{AC}$  device.

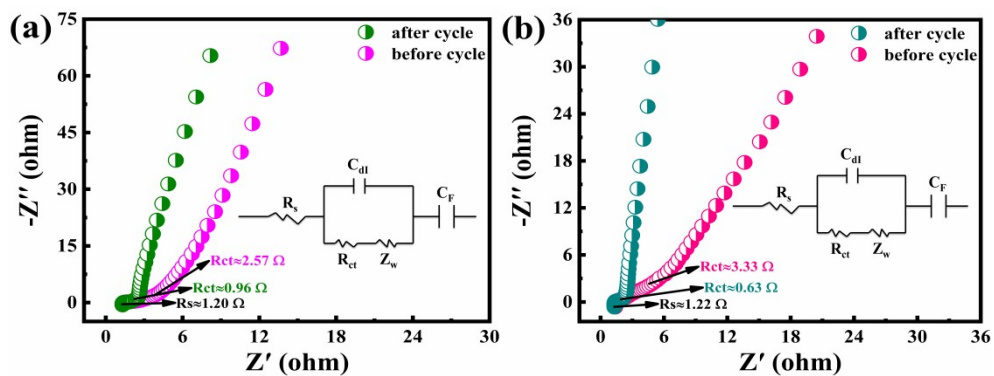

**Fig. S7.** (a) Charge transfer internal resistance curve of  $\text{Ti}_3\text{C}_2@\text{NiV-LDHs}/\text{AC}$  ASC. (b) EIS curves of the  $\text{Ti}_3\text{C}_2@\text{NiCo-LDHs}/\text{AC}$  device before and after long-term charge-discharge cycle test.
